# Supplementary material for: The Price of Human Evolution: Cancer-Testis-Antigens, the Decline in Male Fertility and the Increase in Cancer
Source: Preprints.org preprint supplement (doi:10.20944/preprints202306.0833.v1), 2023-06-12
Supplement: Supplementary file 2 [file supplementary]

## Sheet: gg_by_phylostrata
1	2	3	4	5	6	7	8	9	10	11	12	13	14	15	16
ABCA13	ACOXL	BIRC5	ACVR2B	AC004381.6	ADAMTS3	BACH2	ALX1	ACRBP	AKAP4	ACTRT3	ACPT	C6orf52	ARL17A	ALG1L	CTAG2
ABCA4	AK7	CENPI	ADAMTS17	ADAMTS12	ALK	CHRNB4	AMER1	ADAM2	ANHX	AKAP3	ACTL8	COX8C	BTBD18	APOBEC3B
ABCC11	AK9	CHEK1	ADORA2A	ADAMTS6	ASXL3	CILP2	ANG	ADAM29	ART5	AKR1E2	ARRDC5	DPPA3	CT45A1	BPY2C
ACAD11	ALG10	DCLRE1C	ANKAR	ANKEF1	C10orf95	CNTLN	ANKRD61	C10orf12	BPIFA1	AUNIP	C11orf71	LY6K	CT45A2	C10orf25
ACSM1	ALG10B	FAM72A	APLF	ATAD5	CDKN1B	FAM78B	ARHGAP28	C11orf96	CAGE1	C4orf36	C19orf57	RBMXL2	CT45A4	C20orf197
AK8	ANO2	HMGA2	ARHGAP11A	BCL2	CHRM3	FASLG	ASB14	C12orf60	CALR3	C9orf84	C1orf64	SLFN12L	CT45A5	C22orf34
ALPPL2	AP1S3	KNOP1	ARHGEF18	C7orf55	CSMD2	LIM2	ATP6AP1L	C17orf67	CCDC110	CD70	C9orf131	ZSCAN12	CT45A6	CST1
AOC2	ARMC3	NF1	ARX	C8orf48	CSMD3	MDGA2	B3GNT5	C17orf80	CDKL3	CLDN6	CD160	ZSCAN22	CT47B1	CT47A10
ATP6V0C	ASPM	PAPPA	AVEN	CASC5	CST2	NCKAP5	BCL2L14	C21orf62	CENPA	CRYGD	CPXCR1		CTAG1B	CT47A11
ATP6V1E2	ATAD2	PAPPA2	B3GNT4	CBX2	CTAGE1	NODAL	BEAN1	CCDC122	CLEC12B	DNMT3L	DKKL1		DLEU1	CT47A2
B3GNTL1	ATG10	SLC16A7	BLOC1S3	CCDC144A	CTAGE5	RGR	BEND3	CCDC36	DAND5	DPPA4	DPPA2		FAM24B	CT47A3
BLM	ATP5EP2	SOX1	BORA	CCDC89	CTCFL	SOGA3	BFSP1	CCDC73	ENAM	KLK15	DPPA5		FAM9A	CT47A4
BRIP1	ATR	SPAG4	C12orf66	CENPK	DEPDC1	TMEFF2	BFSP2	CCL17	FAM186B	LEMD1	FAM111B		FAM9B	CT47A5
C21orf33	AURKA	SUN5	C16orf87	CENPL	ERVW-1	ZNF280C	C16orf59	CEP57L1	FOXP3	NANOG	FAM90A1		FAM9C	CT47A6
CBWD1	AURKC	TMED7	C1orf112	CENPO	FBXO39	ZNF407	C18orf54	CHST4	GPR3	NRL	FATE1		FTHL17	CT47A7
CBWD6	BCDIN3D	ZC3H11A	C5orf34	CHRNA7	GABRG3		C1QL4	CRLF2	IL23A	OAZ3	FMR1NB		GAGE12D	CT47A8
CCDC65	BRCA1	ZNF683	C6orf163	CKAP2L	GBX2		C1orf226	FAM196B	KCNJ14	PRR19	HSPB9		GAGE12E	CT47A9
CDC6	BRCA2		C7orf57	CMTM1	GRIN3A		C5orf24	GP6	KIAA1210	PRSS21	IGSF23		GAGE12J	DSCR8
CDKN3	BUB1		CACNA2D4	CXorf67	GRPR		CCDC152	HAUS8	KREMEN2	RFX8	INSL6		GAGE2A	FAM122C
CENPE	BUB1B		CCDC138	DAZL	HTR7		CCDC18	HJURP	LEP	RIMBP3	KDM4D		GNRH2	FAM86C1
CENPF	C11orf70		CCDC15	DCX	HYAL4		CCL22	HSFY2	MROH8	RNF183	KHDC3L		HDGFL1	MAGEA1
CHAC2	C12orf45		CCDC170	DDX43	INHBB		CCR4	IL7	PRSS54	S100A7A	LUZP4		KHDC1L	MAGEA12
CYP4Z1	C17orf53		CCDC171	DDX53	ITIH4		CCSER1	ITPRIPL1	RAB42	TSACC	MAGEA10		MAGEA11	MAGEA8
DDX4	C3orf67		CCDC33	DEPDC1B	LCORL		CD101	LIPI	ROPN1	TULP2	MAGEA9		MAGEA2	MAGEC1
DDX47	C7orf25		CCDC62	DNMT3B	LIN28A		CDKN2B	LRRC37A2	ROPN1B	ZKSCAN3	MAGEA9B		MAGEA2B	MAGEC3
DMC1	C8orf37		CCDC83	ESPNL	LIN28B		CDKN2D	MIXL1	SPATA19	ZNF2	MAGEB1		MAGEA3	PRR26
DNA2	C9orf85		CCNB3	FANCA	LMTK2		CDY1B	MLN	SPDYC	ZNF572	MAGEB2		MAGEA6	SPANXB1
DNAJB13	CAMKMT		CDRT1	FBXO5	MAEL		CENPP	NAALADL2	SPDYE1	ZNF774	MAGEB3		MAGEB6	SPANXB2
DPEP3	CCDC113		CEP152	FKBP6	MRPS17		CEP128	NLRP2	SPESP1		MAGEB4		MAGEC2	SPANXD
DPH6	CCDC148		CEP72	GDF6	MTL5		CHODL	NLRP4	TEX15		MAGEB5		NPIPB3	TAS2R19
DTWD2	CCNA1		CERS1	GPATCH2	NANOS3		CHRNA5	NLRP7	ZKSCAN2		MORC1		NPIPB4	TMSB4Y
DUS4L	CCNA2		CLSPN	GTSF1	NR6A1		CLDN20	NLRP9	ZNF646		ODF4		PAGE1	TSPY2
ERCC4	CCT6B		CREB1	HELB	NRG1		CLEC3A	POLR2J3	ZSCAN10		OOEP		PAGE2	TSPY3
FAHD1	CDC25A		CTNNA2	KCNK13	ODF1		CLNK	PRAP1	ZSCAN2		PABPC5		PAGE2B	ZNF610
FANCM	CDC25C		CYB5RL	KIAA1524	OTOA		CLUL1	PRSS55			PAEP		PAGE3	ZNF788
FGGY	CDC45		DCHS2	KIF14	PHOX2A		CNIH3	SAMD3			PAGE5		PAGE4
GAPDHS	CDK5		DGKH	KIF20B	PTCD2		COL10A1	SCT			PASD1		RAB41
GGACT	CDKL2		DLGAP5	KIF25	RBM46		COL20A1	ST8SIA6			PBX4		RPS4Y2
GLUD2	CEP290		DNAJC5B	LCA5L	RGPD3		CRYBB1	TCFL5			PLAC1		SAGE1
HTRA4	CEP76		E2F8	LMX1B	RGPD4		CXCL11	TEKT5			PRAME		SEMG1
IBA57	CNGA1		EFCAB11	LRRC8D	RNF212		CYP19A1	TEX14			PRM2		SPANXN2
IL4I1	CORO7		EFCAB6	M1AP	SOX6		DMRT1	TM4SF19			PRSS50		SPANXN3
KYNU	COX6B2		EME1	MEI1	SPINK2		DUSP18	TMEM108			SIGLEC5		SPANXN4
LACE1	CRB1		FAM175A	MEIOB	STK31		EDAR	TMEM140			SLCO6A1		SPANXN5
LDHC	CRIP1		FAM47E	MSTN	SYCP2		EDARADD	TMPRSS12			SOAT2		SSX1
LIAS	CTDSP1		FANCB	NOL4	SYT10		EGF	TNFSF11			SSX4		SSX2
LIPT1	CUL2		FBXO10	OTUD7A	TDRD12		ELL3	TNFSF4			SSX4B		SSX3
LIPT2	DCAF12		FBXO36	PARPBP	TECTA		EME2	TSSK3			TCEAL1		SSX5
MCM8	DCAF4L2		FBXO43	PBK	THAP9		ESR2	ZNF469			TCL1B		TAS2R31
MEMO1	DIAPH3		FRMPD1	PCDHA1	TIGD7		F11R	ZSWIM3			TEX19		TFDP3
METTL15	DIEXF		FSIP1	PCDHA4	TMEM169		F2RL2				TMEM217		XAGE2
METTL20	DNAH10		GATC	PCDHAC1	TRIQK		FAM124B				TRIM60		XAGE2B
METTL21A	DNAH14		GEMIN6	PCDHB2	TSSK4		FAM19A3				TRIML2		XAGE3
MOCS3	DNAH2		GPR143	PCDHB3	USP49		FAM46D				UCN2		XAGE5
MTHFR	DNAH5		GRM8	PCDHB6	WNT7A		FAM64A				UTF1		ZNF26
MYH15	DNAH7		GTPBP10	PCDHGA1	ZFP64		FGF19				ZCCHC16		ZNF485
NANP	DNAH8		GTSE1	PGBD4	ZNF395		FOXH1				ZFP37		ZNF501
NAT1	DNAH9		HMMR	PKD1L1	ZNF425		GCNT7				ZFP42		ZNF582
NUDT13	DNAJB8		HS6ST3	PRDM14	ZNF660		GDF3				ZFP69		ZNF645
ORC1	DNAJC24		HUNK	PRDM9			GDF5				ZFP69B		ZNF669
PARS2	DNAJC28		INSRR	PRELID2			GIP				ZNF114		ZNF670
PCBD2	DNASE2B		IRAK1BP1	PRR11			GMNC				ZNF169		ZNF696
PLD6	DSCC1		KIAA0391	RBM4			GP1BA				ZNF19
PTGR2	DTL		KIAA0586	RPP14			GPR1				ZNF214
PTRH1	DUSP19		KIAA0825	SAMD13			GPR39				ZNF215
PUS10	DYRK3		KIAA1328	SHCBP1			GPR75				ZNF280B
PYURF	E2F7		L3MBTL4	SKA3			HAPLN1				ZNF286A
RAD51	ELOVL4		LHCGR	SKIDA1			HESX1				ZNF311
RTEL1	ELP4		LHX9	SPA17			IGFLR1				ZNF322
SARS2	ERCC5		LRRC27	SPATA22			IGSF11				ZNF324B
SDHAF2	ERCC6L		LYG2	SPDYA			IL10				ZNF391
SLC10A7	ERCC8		MAP10	SYCE2			IL12RB2				ZNF557
SLC24A5	ESCO2		MCMDC2	TBATA			IL13RA2				ZNF559
SLC35G1	EXO1		MCPH1	TBX10			ITGB3BP				ZNF575
SLC6A2	EXO5		MED12L	TCTE3			KBTBD8				ZNF597
SRR	FAM133A		MED26	TDRD1			KCNMB2				ZNF619
SVOPL	FAM188B		MEIG1	TDRD5			KCNMB3				ZNF620
TATDN2	FER1L6		MGAT4C	TEPP			KCNV2				ZNF684
TKTL1	GDAP2		MIPOL1	TMEFF1			KIAA1211				ZNF70
TMPPE	GEN1		MMS22L	TMEM68			KIAA1549				ZNF792
TRIM71	GET4		MOS	TMPRSS9			KLHL11				ZNF891
	GINS1		MYO3A	USH2A			LCN15				ZSCAN23
	GINS2		MYO3B	ZC3H10			LCOR				ZSCAN5A
	GINS3		NANOS1	ZWILCH			LRAT
	GINS4		NDUFA7	ZYG11A			LRFN4
	GPR89B		NHEJ1	WNT3			LRRTM4
	GSG2		PIK3R2				MAB21L3
	GSTCD		PLA2G10				MFSD2B
	H2AFX		PLK4				MPL
	HARBI1		POMK				MYO16
	HHAT		QRFPR				NEIL3
	HIST1H1B		RAD51AP1				NPPC
	HIST1H1E		RBM15				NPW
	HIST1H2AI		RBM7				NR0B1
	HIST1H2AM		RGS22				NR3C1
	HIST1H2BF		SCLT1				NSUN3
	HIST1H2BH		SCML2				NTNG1
	HIST1H2BO		SETD9				OIP5
	HIST1H3B		SIM1				OPN1SW
	HIST1H3E		SLC25A51				OPN3
	HIST1H4C		SLCO4C1				PAK6
	HIST1H4I		SLIT1				PARP11
	HIST4H4		SP8				PMP22
	HORMAD1		SPAG17				PROKR1
	HORMAD2		SPAG8				PRPH2
	HSPA1L		SPATA7				PSPN
	IER3IP1		SRGAP1				PTPN20A
	IGF2BP1		STIL				RAG1
	IGF2BP3		STK33				RAG2
	INTS6		STXBP4				RASSF9
	IPMK		T				REC8
	IQCD		TAF1A				RIPPLY3
	IQCH		TBC1D32				RNF169
	IQUB		TDRD6				S100Z
	ISY1		TET1				SGOL1
	KCNA3		TEX11				SGOL2
	KCNH5		THEG				SIGLEC15
	KIAA1919		TICRR				SLC22A16
	KIF15		TMEM5				SLC52A1
	KIF18A		TRPM1				SLX4IP
	KIF24		TRPM3				SNN
	KIF27		URB2				SOX3
	KIF4A		USP37				SPINT2
	KIF6		WDPCP				SYCE1
	KIF9		WDR49				SYCP1
	L1TD1		ZNF367				SYCP2L
	LCLAT1		ZXDA				SYT14
	LCMT2		BMP4				TAF4B
	LRP1B						TCP11L2
	LYRM5						TMEM194B
	MAD2L1						TMEM221
	MAK						TRPV1
	MCM10						TSGA10
	MLH3						TSSK6
	MND1						UMODL1
	MSH4						VRTN
	MSH5						XCL1
	MSMO1						ZBTB20
	MTFR2						ZBTB3
	MYB						ZBTB37
	N4BP2						ZBTB8A
	NCAPG2						ZC2HC1C
	NCAPH						ZFY
	NDC80						ZNF410
	NDUFA2						ZNF668
	NEDD8						ZP3
	NEK2						IL1B
	NLGN1						VEGFA
	NME8						PGF
	NME9						JUNB
	NOTUM						FOS
	NUF2						THBD
	NUP62						AREG
	NXF2						AGT
	NXF2B						PTHLH
	ODF3						STC2
	ORC6						ZP4
	OXNAD1						POU5F1
	PABPC3
	PARP2
	PDCL2
	PDE11A
	PDP2
	PGAM5
	PIGN
	PIP5KL1
	PIWIL1
	PIWIL2
	POC1A
	POLE2
	POTED
	POTEG
	POTEH
	PPIL6
	PRKG2
	PSMC3IP
	RAD18
	RAD51B
	RAD51D
	RAD54B
	RAD54L
	RAD9B
	RANBP17
	RBL1
	RBM12B
	RBM34
	RIBC1
	RIBC2
	RIIAD1
	RNF32
	RPA1
	RPA2
	RPP38
	RQCD1
	SASS6
	SCAI
	SENP8
	SIAH1
	SKA1
	SLC24A4
	SLC2A14
	SLC35A1
	SLC38A9
	SLC44A5
	SMC1B
	SPAG1
	SPAG16
	SPAG6
	SPATA17
	SPATA5
	SPC25
	SPEF2
	SPRTN
	STAG3
	SUV39H2
	SYN3
	TAF7L
	TBC1D7
	TCEANC2
	TERT
	TIGD6
	TIMM8A
	TIPIN
	TMLHE
	TPPP2
	TRAIP
	TRDMT1
	TRIM59
	TRIP13
	TRMT10A
	TTC26
	TTC30A
	TTC30B
	TTF2
	TTK
	TTLL9
	TVP23A
	UBE2V1
	UBE3D
	UBR2
	UFSP1
	VAMP2
	VASH2
	VKORC1
	VPS33A
	VTI1A
	WDHD1
	WDR31
	WDR62
	WDR76
	WDR78
	WDR89
	WDR92
	WNK3
	XRCC2
	ZDHHC15
	ZNF180
	ZNF208
	ZNF223
	ZNF225
	ZNF227
	ZNF229
	ZNF23
	ZNF233
	ZNF257
	ZNF264
	ZNF268
	ZNF287
	ZNF429
	ZNF43
	ZNF430
	ZNF443
	ZNF460
	ZNF468
	ZNF470
	ZNF483
	ZNF490
	ZNF492
	ZNF525
	ZNF527
	ZNF543
	ZNF546
	ZNF548
	ZNF555
	ZNF560
	ZNF563
	ZNF565
	ZNF568
	ZNF570
	ZNF571
	ZNF573
	ZNF583
	ZNF587
	ZNF593
	ZNF607
	ZNF611
	ZNF624
	ZNF675
	ZNF676
	ZNF677
	ZNF678
	ZNF681
	ZNF69
	ZNF695
	ZNF701
	ZNF709
	ZNF714
	ZNF716
	ZNF717
	ZNF729
	ZNF749
	ZNF763
	ZNF765
	ZNF776
	ZNF778
	ZNF780A
	ZNF782
	ZNF790
	ZNF799
	ZNF805
	ZNF81
	ZNF813
	ZNF845
	ZNF85
	ZNF852
	ZNF879
	ZNF93
	ZNF98
	ZRANB3
